# Supplementary material for: Formation of CuO nano-flowered surfaces via submerged photo-synthesis of crystallites and their antimicrobial activity
Source: PubMed Central journal article supplement (PMC5430675; doi:10.1038/s41598-017-01194-5), 2017-04-21
Supplement: 41598_2017_1194_MOESM1_ESM.pdf [file 41598_2017_1194_MOESM1_ESM.pdf]

# Supplementary Information

## **Formation of CuO nano-flowered surfaces *via* submerged photo-synthesis of crystallites and their antimicrobial activity**

Fumika Nishino<sup>1</sup>, Melbert Jeem<sup>1</sup>, Lihua Zhang<sup>2</sup>, Kazumasa Okamoto<sup>2</sup>, Satoshi Okabe<sup>2</sup>,

Seichi Watanabe<sup>2\*</sup>

*1. Graduate School of Engineering, Hokkaido University, N13, W8, Kita-ku, Sapporo,  
Hokkaido, 060-8628, Japan.*

*2. Faculty of Engineering, Hokkaido University, N13, W8, Kita-ku, Sapporo, Hokkaido,  
060-8628, Japan.*

\*sw004@eng.hokudai.ac.jp

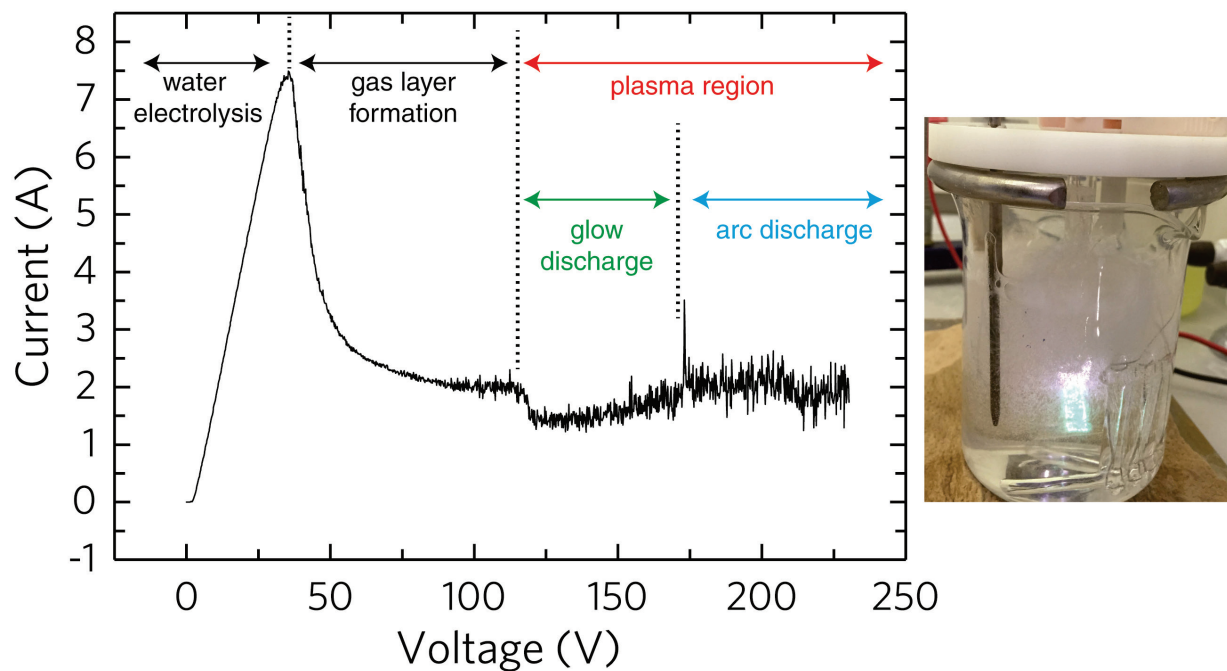

**Supplementary Figure S1.** Typical current-voltage relation curve during plasma treatment of Cu plate. On the far right is a photograph taken during glow discharge state of Cu.

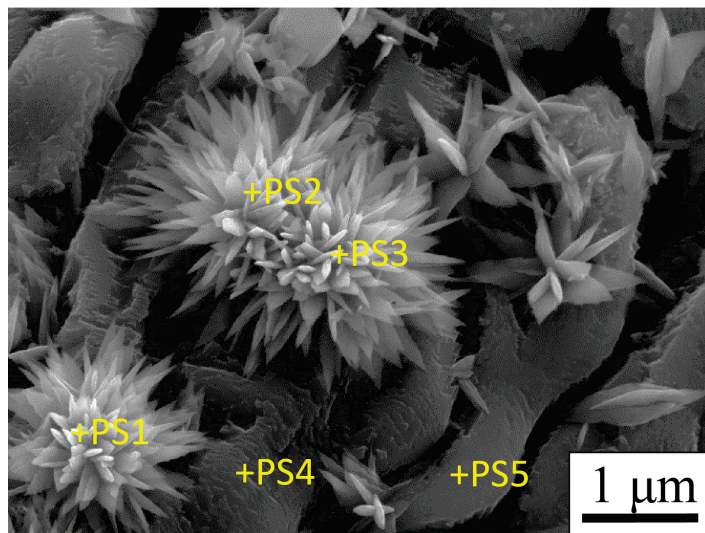

**Supplementary Figure S2.** The plan-view FE-SEM image of SPSC-24h sample and PS1-PS5 are the EDS point analysis position.

|      | Cu ( mol % ) | O ( mol % ) |
|------|--------------|-------------|
| PS 1 | 50.2         | 49.8        |
| PS 2 | 45.7         | 54.3        |
| PS 3 | 49.3         | 50.7        |
| PS 4 | 74.3         | 25.7        |
| PS 5 | 71.3         | 28.7        |

**Supplementary Table S1.** The EDS points analysis result for point PS1-PS5 in Figure S2.

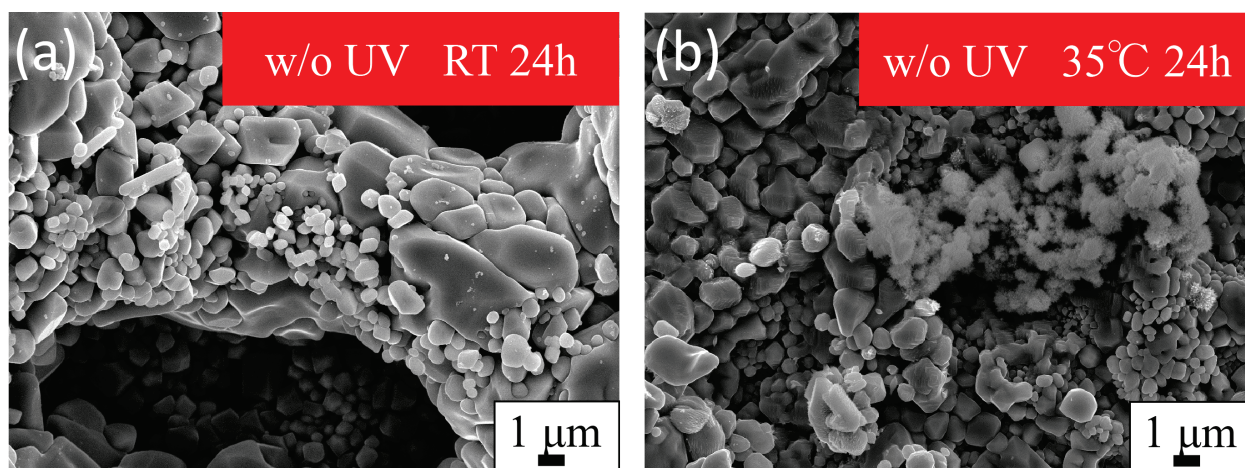

**Supplementary Figure S3.** Thermal effect on CuO nanostructure formation without UV irradiation for 24 hours in water. FE-SEM images (a) at room temperature (b) at 35 °C. No nanoflower formation was observed in both cases.

| Sample               | Before UV<br>(mg) | After UV<br>(mg) | Weight<br>change (mg) | Weight<br>change (%) |
|----------------------|-------------------|------------------|-----------------------|----------------------|
| Plasma-treated       | 985.487           | 985.848          | 0.361                 | 0.037                |
| Without plasma (raw) | 1558.610          | 1559.011         | 0.401                 | 0.026                |

**Supplementary Table S2.** Typical weight change of Cu samples after UV irradiation.

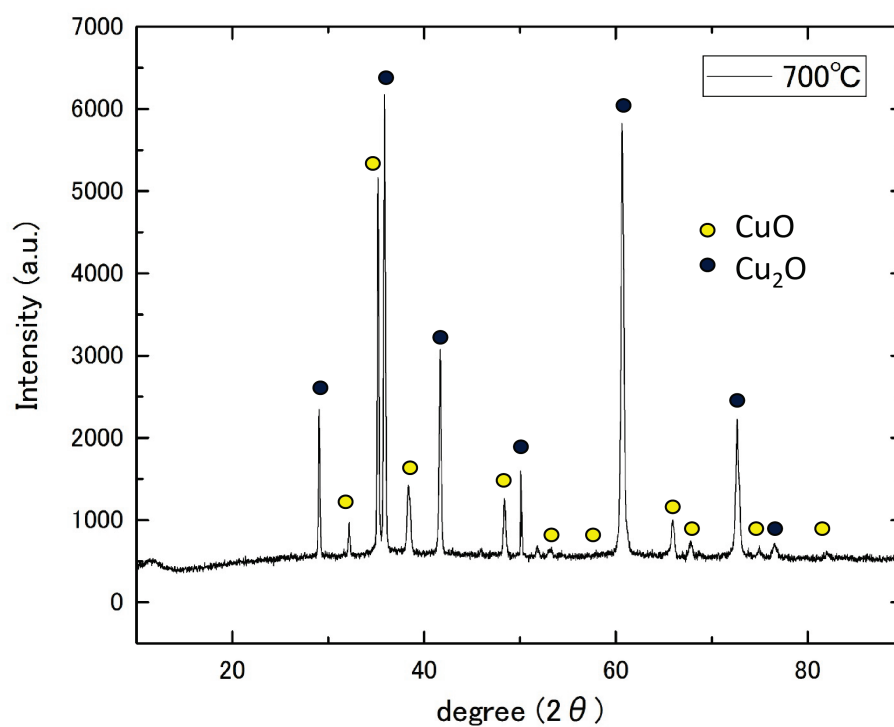

**Supplementary Figure S4.** XRD patterns of the sample after been annealed at 700 °C.
